# Supplementary material for: Risk of major adverse cardiovascular events with tofacitinib versus tumour necrosis factor inhibitors in patients with rheumatoid arthritis with or without a history of atherosclerotic cardiovascular disease: a post hoc analysis from ORAL Surveillance
Source: HighWire-hosted journal article supplement (doi:10.1136/ard-2022-222259), 2022-09-22
Supplement: ard-2022-222259supp001_data_supplement.pdf [file ard-2022-222259supp001_data_supplement.pdf]

## **SUPPLEMENTAL MATERIAL**

### **SUPPLEMENTARY METHODS**

#### **Statistical analyses of treatment-by-history of atherosclerotic cardiovascular disease (ASCVD) interactions**

Two approaches were followed to assess the treatment-by-HxASCVD interaction for major adverse cardiovascular events (MACE), myocardial infarction (MI) and stroke. First, for the Cox proportional hazard regression models (ie, hazard ratios [HRs]), two Cox interaction models, including treatment group, HxASCVD and treatment-group-by-HxASCVD interaction, as covariates (one model using tofacitinib 5 mg twice daily [BID], 10 mg BID and tumour necrosis factor inhibitors [TNFi]; another model using combined tofacitinib doses and TNFi) were performed to assess whether the treatment effect (tofacitinib vs TNFi) on the time to MACE, MI or stroke differed between HxASCVD Yes vs No (ie, differential effect). A small interaction p-value (Chi-square test with 1 degree of freedom) would be suggestive of the presence of such a differential treatment effect between HxASCVD Yes vs No. Second, the differential effect (tofacitinib vs TNFi) between HxASCVD Yes vs No was assessed using the difference of the incidence rates (IRD) between HxASCVD Yes vs No and its standard error. The 2-sided interaction p-value was calculated assuming normal approximation to the difference of IRD. A small interaction p-value would suggest the presence of such a differential treatment effect between HxASCVD Yes vs No.

## SUPPLEMENTAL TABLES

**Supplemental table 1** List of preferred terms/code to identify history of CeVD, PAD and ASCVD

| Classification                        | Preferred Term (MedDRA v24.1)    | Preferred Term Code          |
|---------------------------------------|----------------------------------|------------------------------|
| CeVD                                  | Ischaemic stroke                 | 10061256                     |
|                                       | Transient ischaemic attack       | 10044390                     |
|                                       | Cerebrovascular accident         | 10008190                     |
|                                       | Cerebral ischaemia               | 10008120                     |
|                                       | Cerebral infarction              | 10008118                     |
|                                       | Carotid endarterectomy           | 10007692                     |
|                                       | Carotid artery stent insertion   | 10066102                     |
|                                       | Carotid artery disease           | 10061744                     |
|                                       | Carotid artery occlusion         | 10048964                     |
|                                       | Carotid artery stenosis          | 10007687                     |
|                                       | Carotid arteriosclerosis         | 10067116                     |
|                                       | Cerebral arteriosclerosis        | 10065559                     |
|                                       | Brachiocephalic arteriosclerosis | 10075449                     |
|                                       | PAD                              | Peripheral artery thrombosis |
| Peripheral artery angioplasty         |                                  | 10057518                     |
| Peripheral artery bypass              |                                  | 10072561                     |
| Peripheral artery stent insertion     |                                  | 10072562                     |
| Arterial occlusive disease            |                                  | 10062599                     |
| Peripheral arterial occlusive disease |                                  | 10062585                     |
| Intermittent claudication             |                                  | 10022562                     |
| Aortic arteriosclerosis               |                                  | 10065558                     |
| ASCVD                                 | Arterial stent insertion         | 10061657                     |
|                                       | Arterial stenosis                | 10060965                     |
|                                       | Arteriosclerosis                 | 10003210                     |
|                                       | Stent placement                  | 10048561                     |
|                                       | Vascular stent insertion         | 10063382                     |
|                                       | Endarterectomy                   | 10014648                     |

Patients who had  $\geq 1$  of the preferred terms in their general medical history (provided at trial inclusion) were classified to have either history of CeVD or PAD. History of CAD was captured directly in electronic case report form by the investigator, who provided this based on history of MI, unstable angina, stable angina

pectoris, coronary artery procedures or other CHD. Patients who had  $\geq 1$  of CAD, CeVD or PAD were classified as patients with history of ASCVD.

ASCVD, atherosclerotic cardiovascular disease; CAD, coronary artery disease; CHD, coronary heart disease; CeVD, cerebrovascular disease; MedDRA, Medical Dictionary for Regulatory Activities; MI, myocardial infarction; PVD, history of peripheral vascular disease.

**Supplemental table 2** NNH (95% CIs)\* for adjudicated MACE based on IR difference, overall and by HxASCVD

|                                                  | <b>Tofacitinib<br/>5 mg BID<br/>(N=1455)</b> | <b>Tofacitinib<br/>10 mg BID<br/>(N=1456)</b> | <b>Combined<br/>tofacitinib doses<br/>(N=2911)</b> |
|--------------------------------------------------|----------------------------------------------|-----------------------------------------------|----------------------------------------------------|
| <b>NNH vs TNFi, PY (95% CIs)</b>                 |                                              |                                               |                                                    |
| Overall                                          | 567 (-∞ to -571<br>and 189 to ∞)             | 319 (-∞ to -1708<br>and 146 to ∞)             | 412 (-∞ to -1603<br>and 182 to ∞)                  |
| HxASCVD                                          | 80 (-∞ to -453<br>and 37 to ∞)               | 75 (-∞ to -584<br>and 35 to ∞)                | 78 (40 to 1234)                                    |
| No HxASCVD                                       | 4344 (-∞ to -318<br>and 277 to ∞)            | 621 (-∞ to -500<br>and 192 to ∞)              | 1113 (-∞ to -478<br>and 257 to ∞)                  |
| <b>NNH vs TNFi, 5-year (95% CIs)<sup>†</sup></b> |                                              |                                               |                                                    |
| Overall                                          | 113 (-∞ to -114<br>and 38 to ∞)              | 64 (-∞ to -342<br>and 29 to ∞)                | 82 (-∞ to -321<br>and 36 to ∞)                     |
| HxASCVD                                          | 16 (-∞ to -91<br>and 7 to ∞)                 | 15 (-∞ to -117<br>and 7 to ∞)                 | 16 (8 to 247)                                      |
| No HxASCVD                                       | 869 (-∞ to -64<br>and 55 to ∞)               | 124 (-∞ to -100<br>and 38 to ∞)               | 223 (-∞ to -96<br>and 51 to ∞)                     |

For patients randomised to the tofacitinib 10 mg BID group who had their dose of tofacitinib reduced to 5 mg BID, the data collected after patients were switched to tofacitinib 5 mg BID were counted in the tofacitinib 10 mg BID group.

\*Positive NNH refers to the number of PY of tofacitinib exposure needed to have one additional patient with an event compared to TNFi. Negative NNH refers to the reverse. When the 95% CI of the IR difference includes zero, the 95% CI of the NNH has two disjoint (positive and negative) intervals, implying harm in either tofacitinib versus TNFi (positive) or TNFi versus tofacitinib (negative). <sup>†</sup>Number of patients who would need to be treated with tofacitinib for 5 years to have one additional event compared to TNFi.

BID, twice daily; CI, confidence interval; HxASCVD, history of atherosclerotic cardiovascular disease; MACE, major adverse cardiovascular events; N, number of evaluable patients; NNH, number needed to harm; PY, patient-years; TNFi, tumour necrosis factor inhibitor.

## SUPPLEMENTAL FIGURES

**Supplemental figure 1** Baseline CV risk profile of ORAL Surveillance

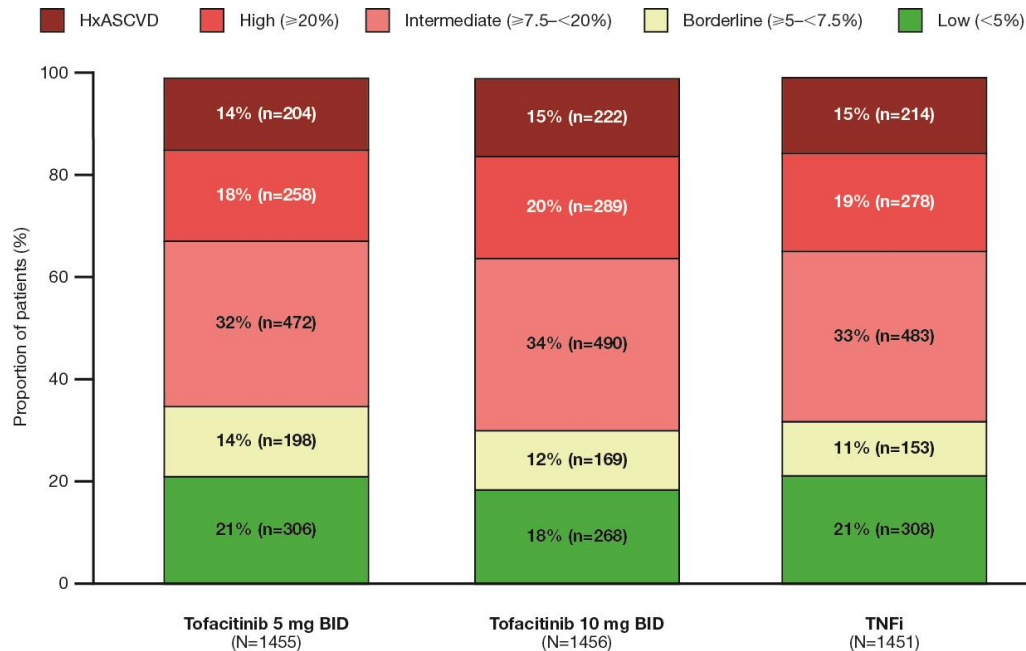

Proportions of patients with and without history of ASCVD were categorised according to their 10-year risk of MACE, per the ASCVD-PCE risk calculator, in ORAL Surveillance. In line with EULAR recommendations, a 1.5 multiplier was applied to all ASCVD-PCE scores.[1] ASCVD was defined as any of CAD, CeVD or PAD. The proportions of patients who had no HxASCVD and were missing ASCVD-PCE risk category data are not shown (tofacitinib 5 mg BID, n=17 [1.2%]; tofacitinib 10 mg BID, n=18 [1.2%]; TNFi, n=15 [1.0%]).

ASCVD-PCE, atherosclerotic cardiovascular disease-Pooled Cohort Equations; BID, twice daily;

CAD, coronary artery disease; CeVD, cerebrovascular disease; CV, cardiovascular; EULAR, European Alliance of Associations for Rheumatology; HxASCVD, history of atherosclerotic cardiovascular disease; MACE, major adverse cardiovascular events; PAD, peripheral artery disease TNFi, tumour necrosis factor inhibitor.

**Supplemental figure 2** IRs of adjudicated MACE outcomes with tofacitinib vs TNFi in

ORAL Surveillance

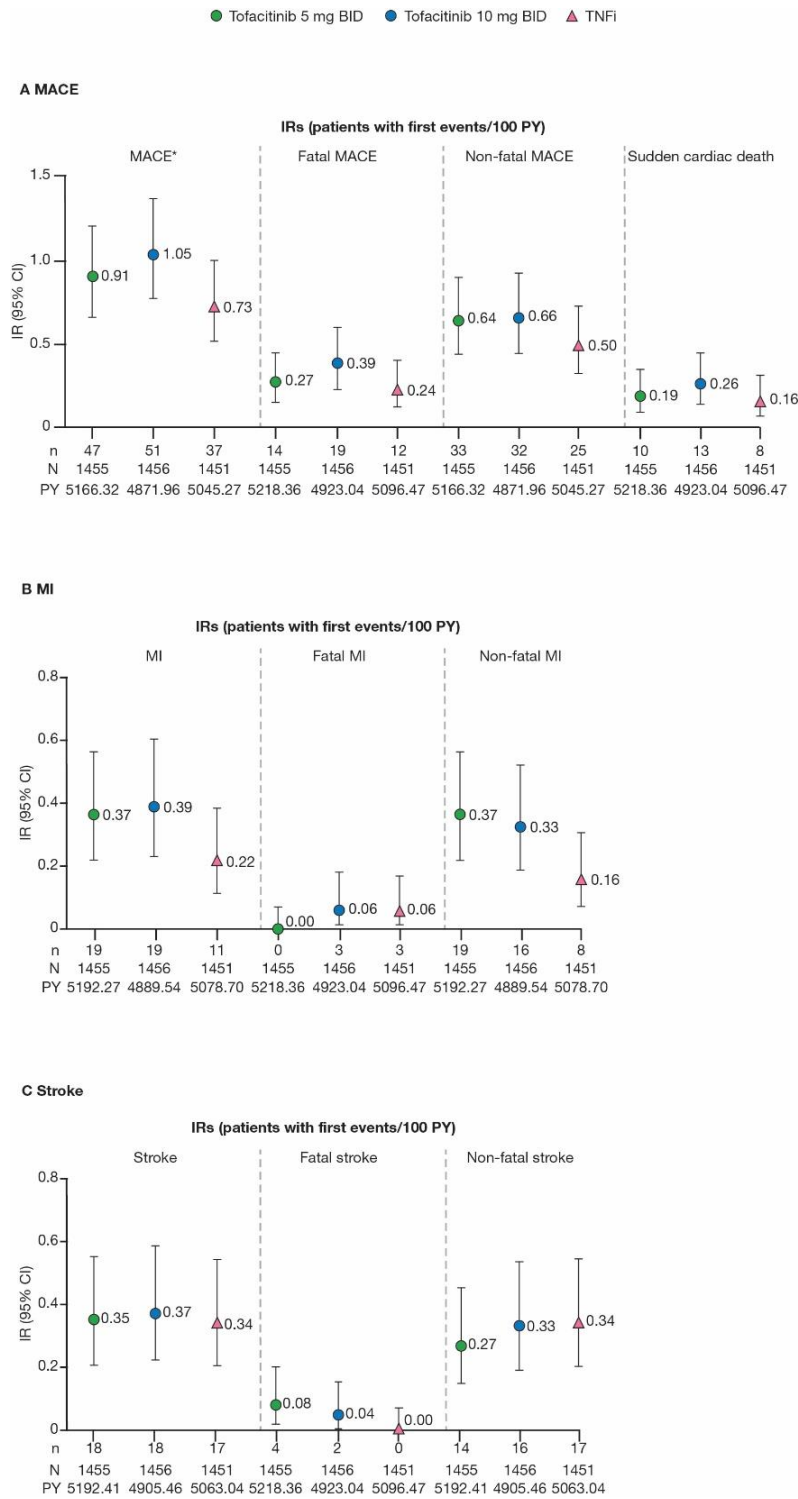

Panels display adjudicated (A) MACE, (B) MI and (C) stroke according to total number of events, fatal events and non-fatal events. Sudden cardiac death is included in fatal MACE.

In this analysis, the risk period was defined as time from first study dose to last study dose +60 days or to the last contact date (if a patient died, the last contact date was death date), whichever was earliest. Patients without events were censored at the end of the risk period.

For patients randomised to the tofacitinib 10 mg BID group who had their dose of tofacitinib reduced to 5 mg BID, the data collected after patients were switched to tofacitinib 5 mg BID were counted in the tofacitinib 10 mg BID group. IRs express the number of patients with first events per 100 PY.

\*Results reported in [2] and included for reference. BID, twice daily; CI, confidence interval; IR, incidence rate; MACE, major adverse cardiovascular events; MI, myocardial infarction; n, number of patients with events; N, number of evaluable patients; PY, patient-years; TNFi, tumour necrosis factor inhibitor.

**Supplemental figure 3** Risk of MACE with tofacitinib vs TNFi in ORAL Surveillance in total time analysis

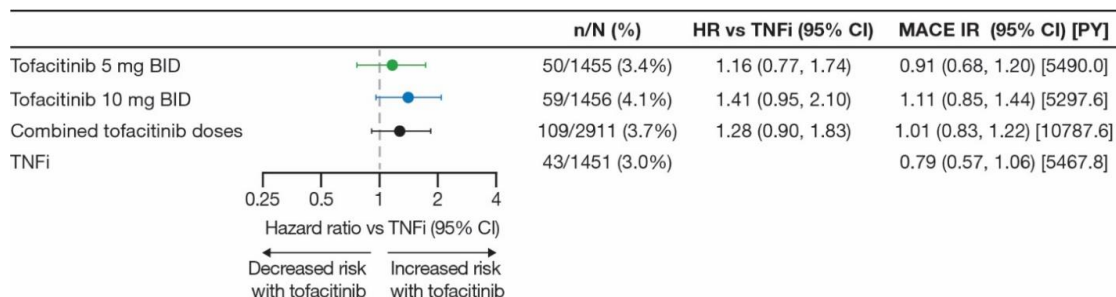

HRs are shown on a logarithmic scale.

In this analysis, the risk period was defined as time from first study dose to last contact date (if a patient died, the last contact date was death date). Patients without events were censored at the last contact date.

For patients randomised to the tofacitinib 10 mg BID group who had their dose of tofacitinib reduced to 5 mg BID, the data collected after patients were switched to tofacitinib 5 mg BID were counted in the tofacitinib 10 mg BID group. HRs (95% CIs) are based on two simple Cox proportional hazard models (one for comparing combined tofacitinib doses vs TNFi and the other for comparing tofacitinib 5 and 10 mg BID vs TNFi), with treatment as the only covariate. IRs express the number of patients with first events per 100 PY.

BID, twice daily; CI, confidence interval; HR, hazard ratio; IR, incidence rate; MACE, major adverse cardiovascular events; n, number of patients with events; N, number of evaluable patients; PY, patient-years; TNFi, tumour necrosis factor inhibitor.



**Supplemental figure 4** MACE IRs with tofacitinib vs TNFi in ORAL Surveillance by 6-month intervals

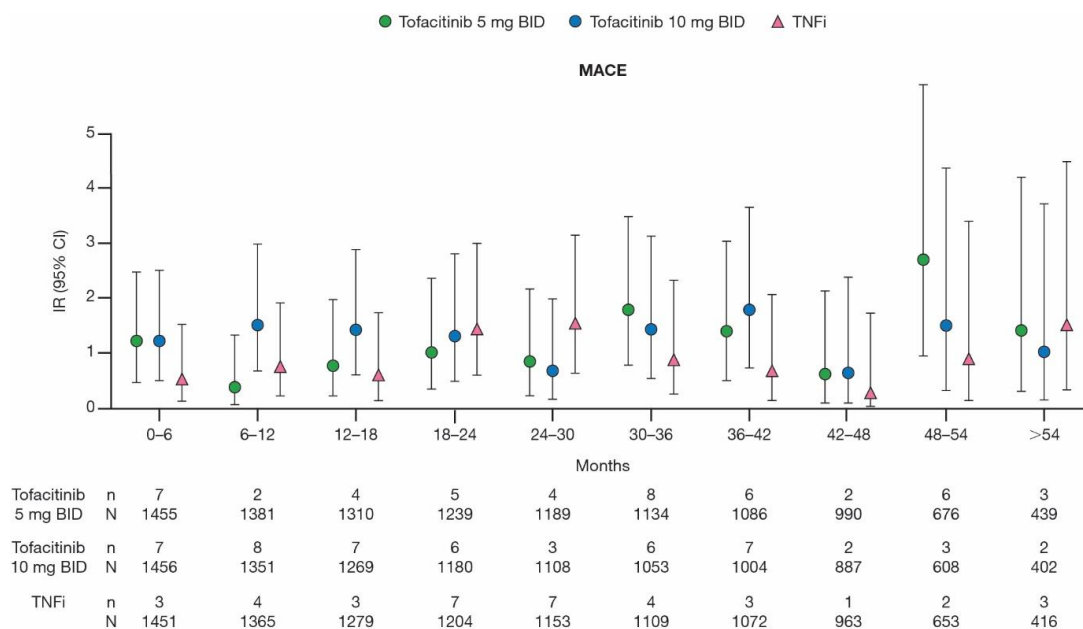

In this analysis, the risk period was defined as time from first study dose to last study dose +60 days or to the last contact date (if a patient died, the last contact date was death date), whichever was earliest. Patients without events were censored at the end of the risk period.

For patients randomised to the tofacitinib 10 mg BID group who had their dose of tofacitinib reduced to 5 mg BID, the data collected after patients were switched to tofacitinib 5 mg BID were counted in the tofacitinib 10 mg BID group. IRs express the number of patients with first events per 100 PY.

BID, twice daily; CI, confidence interval; IR, incidence rate; MACE, major adverse cardiovascular events; n, number of patients with events; N, number of evaluable patients; TNFi, tumour necrosis factor inhibitor.

**Supplemental figure 5** IRs of adjudicated MACE, MI and stroke with tofacitinib vs TNFi by history of ASCVD

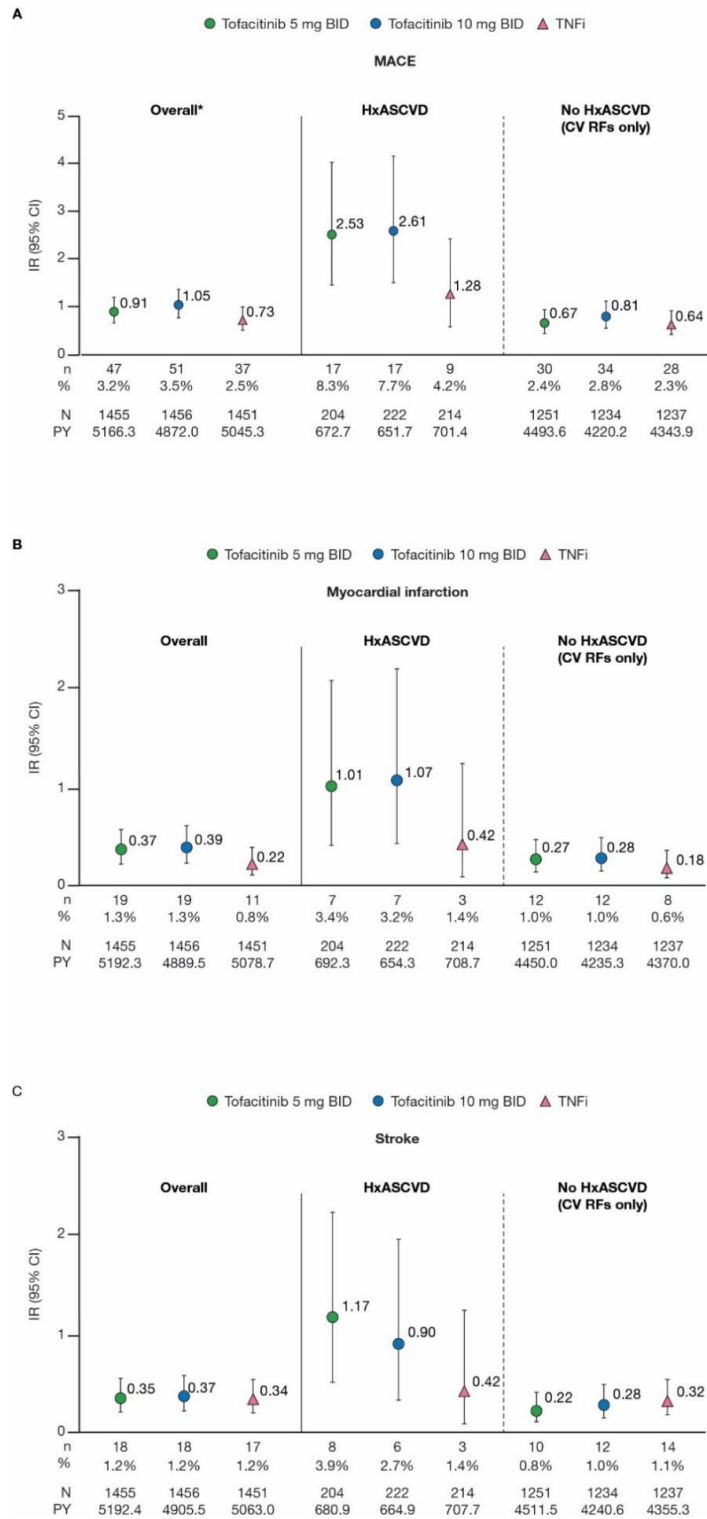

Panels display adjudicated (A) MACE, (B) MI and (C) stroke in overall population, and in patients with and without HxASCVD.

In this analysis, the risk period was defined as time from first study dose to last study dose +60 days or to the last contact date (if a patient died, the last contact date was death date), whichever was earliest. Patients without events were censored at the end of the risk period.

For patients randomised to the tofacitinib 10 mg BID group who had their dose of tofacitinib reduced to 5 mg BID, the data collected after patients were switched to tofacitinib 5 mg BID were counted in the tofacitinib 10 mg BID group. IRs express the number of patients with first events per 100 PY.

\*Results reported in [2] and included for reference. BID, twice daily; CI, confidence interval; CV RF, cardiovascular risk factor; HxASCVD, history of atherosclerotic cardiovascular disease; IR, incidence rate; MACE, major adverse cardiovascular events; MI, myocardial infarction; n, number of patients with events; N, number of evaluable patients; PY, patient-years; TNFi, tumour necrosis factor inhibitor.

### Supplemental figure 6 MACE IRs with tofacitinib vs TNFi in patients without history of ASCVD, according to CV risk categories

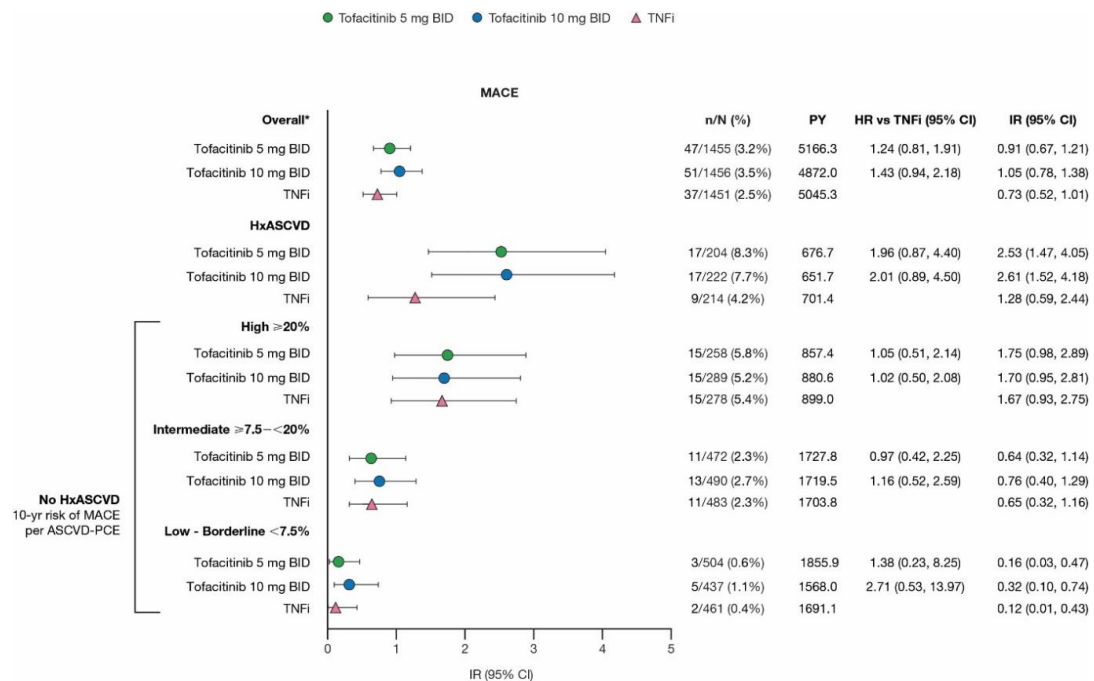

Patients without HxASCVD were categorised according to their 10-year risk of MACE, per the ASCVD–PCE risk calculator. In line with EULAR recommendations, a 1.5 multiplier was applied to all ASCVD–PCE scores.[1] Because of missing ASCVD–PCE scores, two MACE could not be associated with baseline CV risk (n=1 [MI] in tofacitinib 5 mg BID arm and n=1 [stroke] in tofacitinib 10 mg BID arm). For patients randomised to the tofacitinib 10 mg BID group who had their dose of tofacitinib reduced to 5 mg BID, the data collected after patients were switched to tofacitinib 5 mg BID were counted in the tofacitinib 10 mg BID group. HRs (95% CIs) are based on two simple Cox proportional hazard models (one for comparing combined tofacitinib doses vs TNFi and the other for comparing tofacitinib 5 and 10 mg BID vs TNFi), with treatment as the only covariate. IRs express the number of patients with first events per 100 PY.

\*Results reported in [2] and included for reference. ASCVD–PCE, atherosclerotic cardiovascular disease–Pooled Cohort Equations; BID, twice daily; CI, confidence interval; CV, cardiovascular; EULAR, European Alliance of Associations for Rheumatology; HR, hazard ratio; HxASCVD, history of atherosclerotic cardiovascular disease; IR, incidence rate; MACE, major adverse cardiovascular events; n, number of patients with events; N, number of evaluable patients; PY, patient-years; TNFi, tumour necrosis factor inhibitor.

**Supplemental figure 7** MI IRs with tofacitinib vs TNFi in patients without history of ASCVD, according to CV risk categories

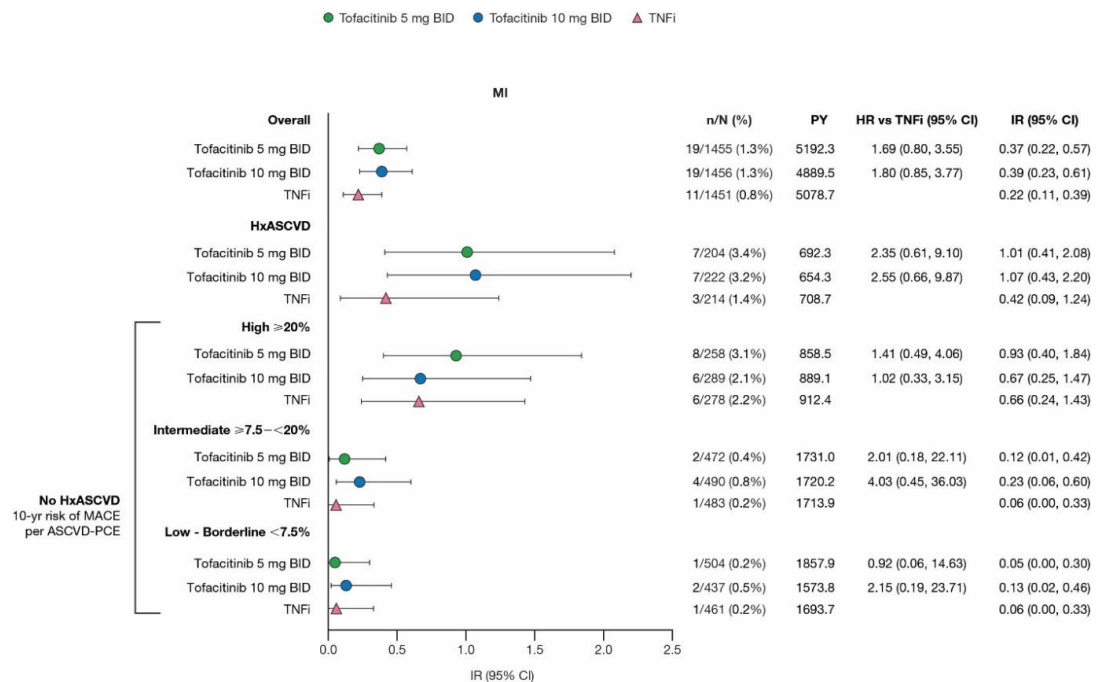

Patients without HxASCVD were categorised according to their 10-year risk of MACE, per the ASCVD–PCE risk calculator. In line with EULAR recommendations, a 1.5 multiplier was applied to all ASCVD–PCE scores.[1] Because of missing ASCVD–PCE scores, one MI in tofacitinib 5 mg BID arm could not be associated with baseline CV risk. For patients randomised to the tofacitinib 10 mg BID group who had their dose of tofacitinib reduced to 5 mg BID, the data collected after patients were switched to tofacitinib 5 mg BID were counted in the tofacitinib 10 mg BID group. HRs (95% CIs) are based on two simple Cox proportional hazard models (one for comparing combined tofacitinib doses vs TNFi and the other for comparing tofacitinib 5 and 10 mg BID vs TNFi), with treatment as the only covariate. IRs express the number of patients with first events per 100 PY.

ASCVD-PCE, atherosclerotic cardiovascular disease-Pooled Cohort Equations; BID, twice daily; CI, confidence interval; CV, cardiovascular; EULAR, European Alliance of Associations for Rheumatology; HR, hazard ratio; HxASCVD, history of atherosclerotic cardiovascular disease; IR, incidence rate; MACE, major adverse cardiovascular events; MI, myocardial infarction; n, number of patients with events; N, number of evaluable patients; PY, patient-years; TNFi, tumour necrosis factor inhibitor.

### Supplemental figure 8 Stroke IRs with tofacitinib vs TNFi in patients without history of ASCVD according to CV risk categories

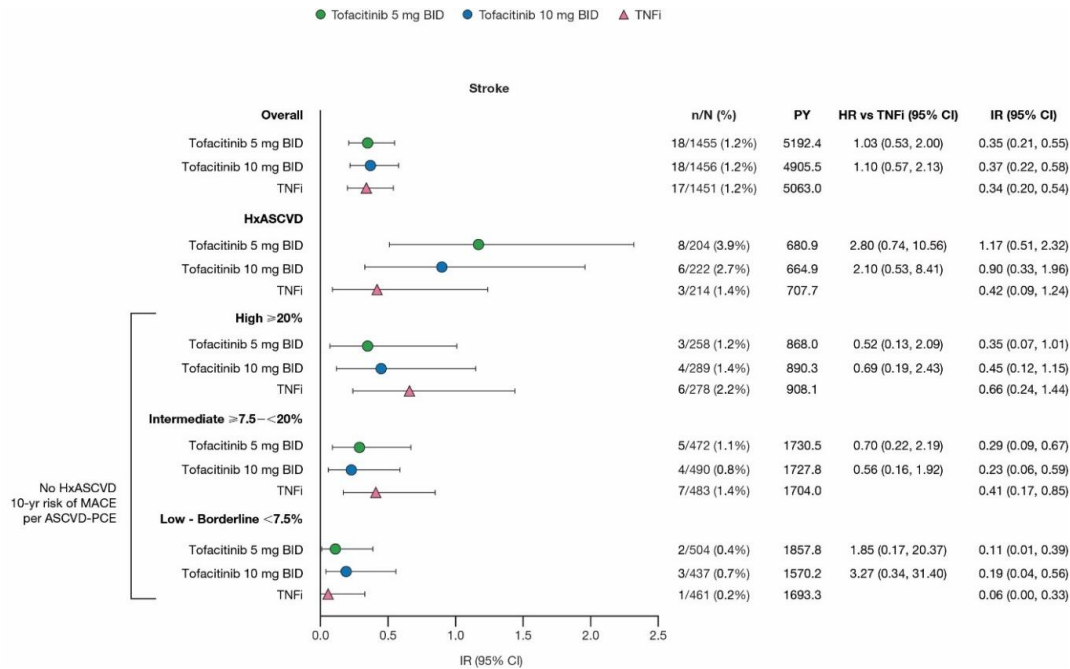

Patients without HxASCVD were categorised according to their 10-year risk of MACE, per the ASCVD–PCE risk calculator. In line with EULAR recommendations, a 1.5 multiplier was applied to all ASCVD–PCE scores.[1] Because of missing ASCVD–PCE scores, one stroke in tofacitinib 10 mg BID arm could not be associated with baseline CV risk. For patients randomised to the tofacitinib 10 mg BID group who had their dose of tofacitinib reduced to 5 mg BID, the data collected after patients were switched to tofacitinib 5 mg BID were counted in the tofacitinib 10 mg BID group. HRs (95% CIs) are based on two simple Cox proportional hazard models (one for comparing combined tofacitinib doses vs TNFi and the other for comparing tofacitinib 5 and 10 mg BID vs TNFi), with treatment as the only covariate. IRs express the number of patients with first events per 100 PY.

ASCVD-PCE, atherosclerotic cardiovascular disease-Pooled Cohort Equations; BID, twice daily; CI, confidence interval; CV, cardiovascular; EULAR, European Alliance of Associations for Rheumatology; HR, hazard ratio; HxASCVD, history of atherosclerotic cardiovascular disease; IR, incidence rate; MACE, major adverse cardiovascular events; n, number of patients with events; N, number of evaluable patients; PY, patient-years; TNFi, tumour necrosis factor inhibitor.

## REFERENCES

- 1 Agca R, Heslinga SC, Rollefstad S, *et al.* EULAR recommendations for cardiovascular disease risk management in patients with rheumatoid arthritis and other forms of inflammatory joint disorders: 2015/2016 update. *Ann Rheum Dis* 2017;76:17–28.
- 2 Ytterberg SR, Bhatt DL, Mikuls TR, *et al.* Cardiovascular and cancer risk with tofacitinib in rheumatoid arthritis. *N Engl J Med* 2022;386:316–26.
